# Supplementary material for: Chemical Eustress Elicits Tailored Responses and Enhances the Functional Quality of Novel Food Perilla frutescens
Source: MDPI journal article supplement (doi:10.3390/molecules24010185), 2019-01-06
Supplement: s1 [file s1]

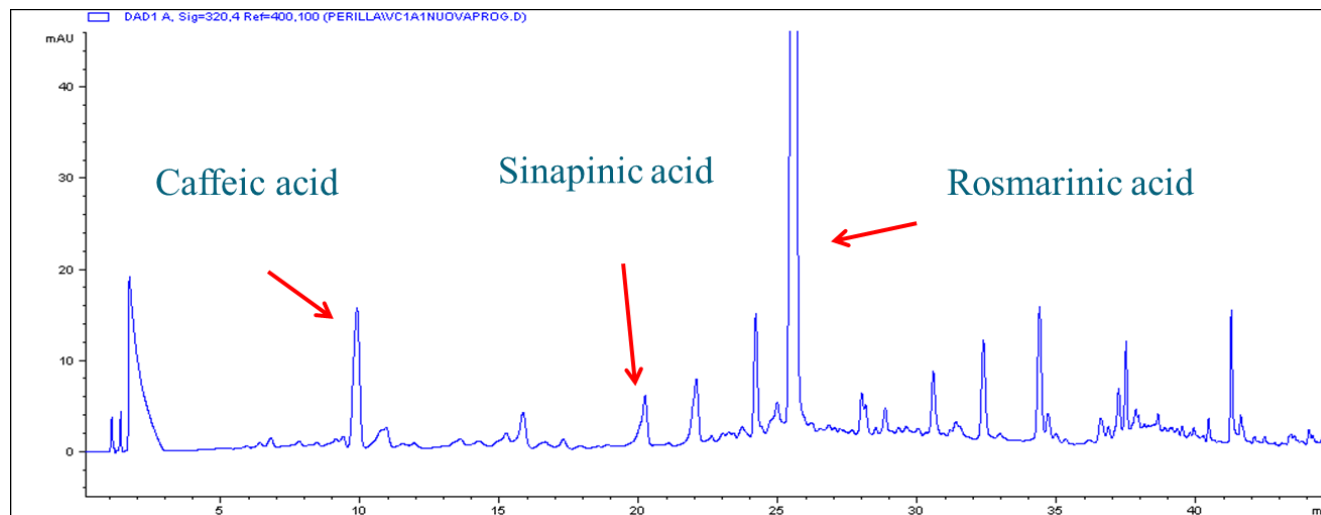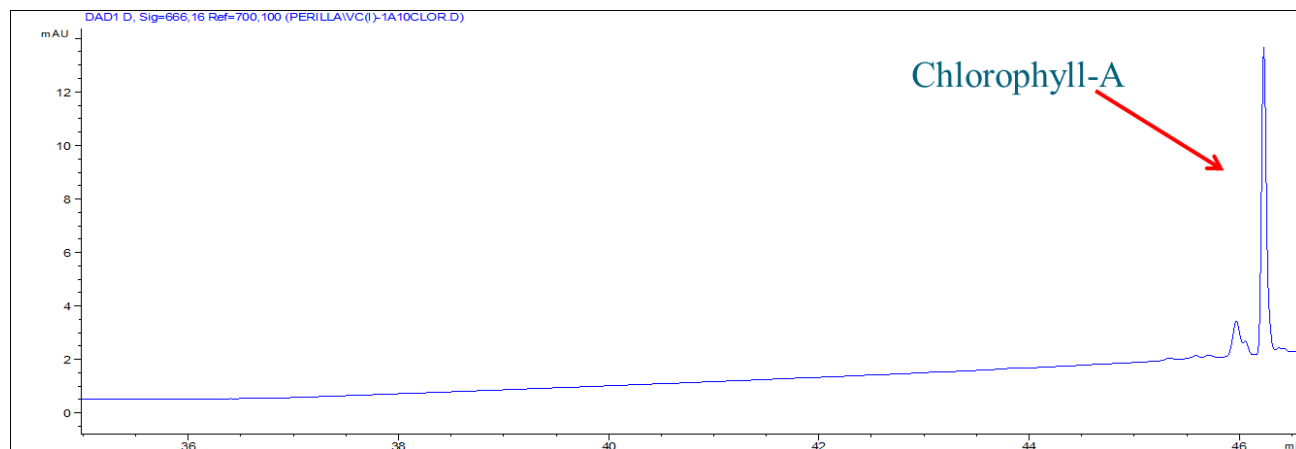

**Figure S1.** Representative HPLC-DAD chromatogram of polyphenolic (rosmarinic, caffeic and sinapic acids) and chlorophyll a extracts of perilla leaves monitored at 320 nm and 666 nm, respectively.

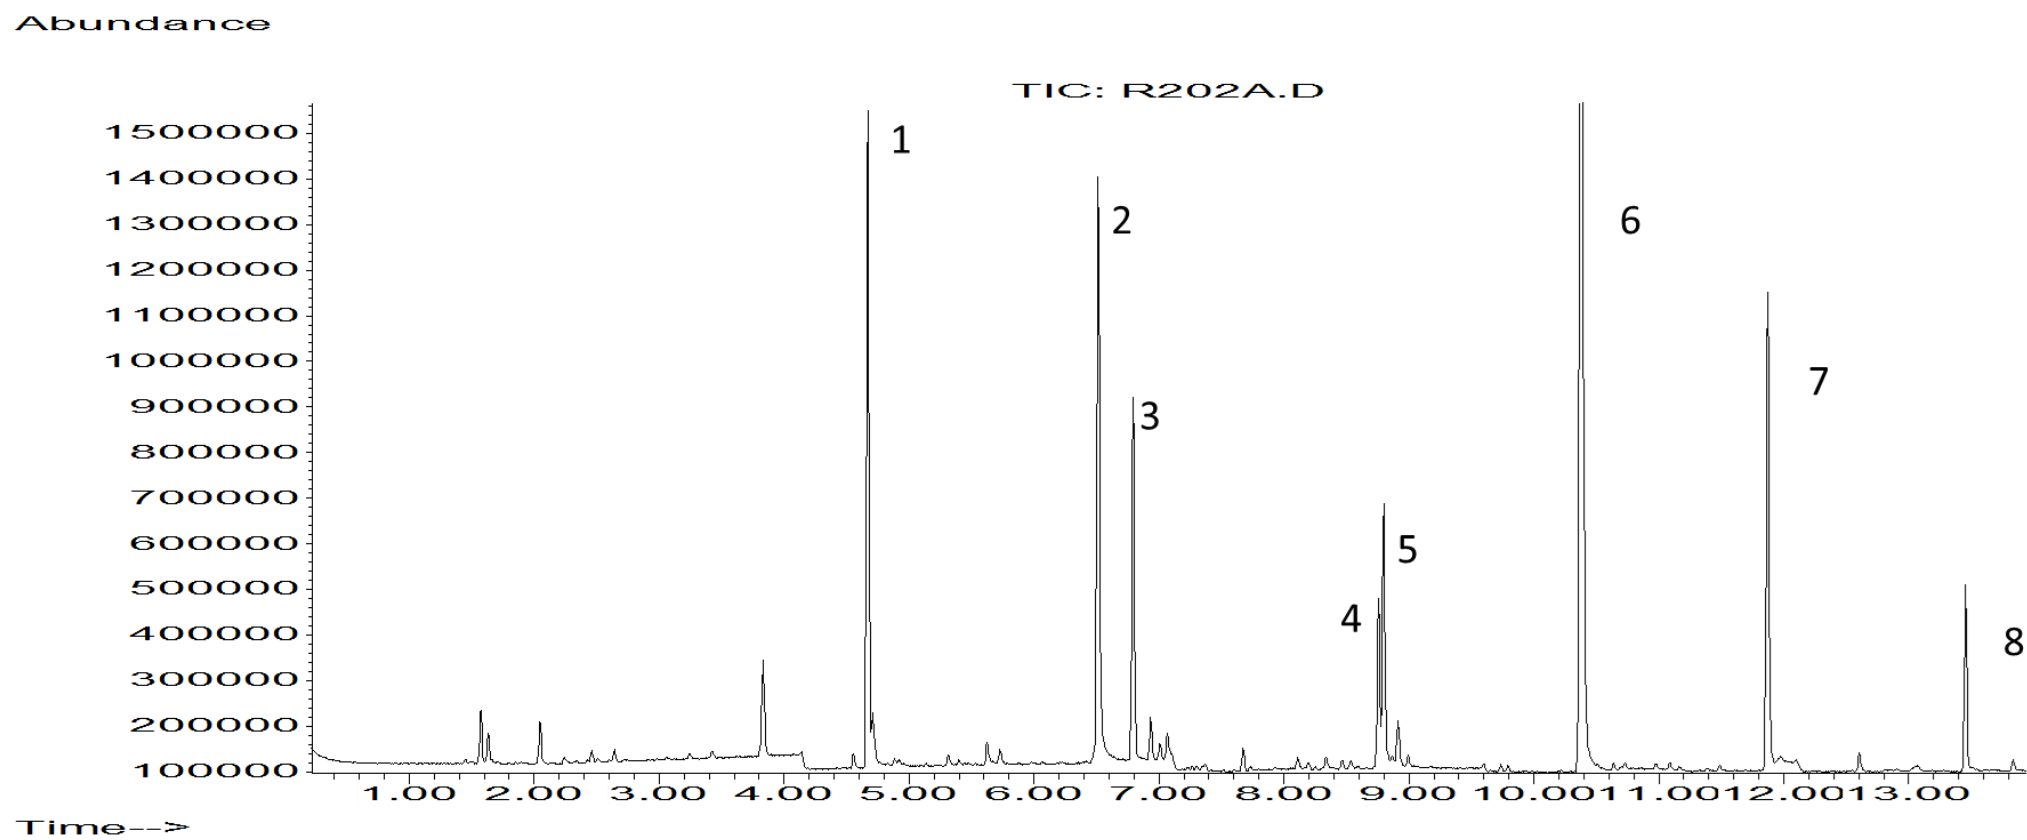

**Figure S2.** Representative SPME-GC/MS chromatogram of aroma volatile compounds of perilla leaves (1: 2-hexenal, 2: Benz-aldehyde, 3: 1-octen-3-ol, 4: Durenol, 5:  $\alpha$ -linalool, 6: Perilla aldehyde, 7: Thymoquinone, 8: Caryophyllene).
